1 Factors influencing leaf- and root-associated  
2 communities of bacteria and fungi across 33 plant  
3 orders in a grassland

4  
5 Hirokazu Toju<sup>1,2\*</sup>, Hiroko Kurokawa<sup>3</sup> and Tanaka Kenta<sup>4</sup>

6  
7 <sup>1</sup>Center for Ecological Research, Kyoto University, Otsu, Shiga 520-2133, Japan

8 <sup>2</sup>Precursory Research for Embryonic Science and Technology (PRESTO), Japan Science and  
9 Technology Agency, Kawaguchi, Saitama 332-0012, Japan

10 <sup>3</sup>Forestry and Forest Products Research Institute, Matsunosato 1, Tsukuba, Ibaraki 305-8687,  
11 Japan

12 <sup>4</sup>Sugadaira Research Station, Mountain Science Center, University of Tsukuba, Ueda, Nagano  
13 386-2204, Japan

14  
15 **\*Correspondence:** Hirokazu Toju (toju.hirokazu.4c@kyoto-u.ac.jp).

16  
17 This article includes 3 Figures, 4 Tables, 1 Supplementary Figure, 3 Supplementary Tables,  
18 and 5 Supplementary Data.

19  
20 Running head: Leaf and root microbiomes across 33 plant orders

21

22 bioRxiv accession: XXXXX

23

24 **Abstract.**

25 In terrestrial ecosystems, plants interact with diverse taxonomic groups of bacteria and fungi  
26 in the phyllosphere and rhizosphere. Although recent studies based on high-throughput DNA  
27 sequencing have drastically increased our understanding of plant-associated microbiomes, we  
28 still have limited knowledge of how plant species in a species-rich community differ in their  
29 leaf and root microbiome compositions. In a cool-temperate semi-natural grassland in Japan,  
30 we compared leaf- and root-associated microbiomes across 138 plant species belonging to 33  
31 plant orders. Based on the whole-microbiome inventory data, we analyzed how sampling  
32 season as well as the taxonomy, nativeness (native or alien), lifeform (herbaceous or woody),  
33 and mycorrhizal type of host plants could contribute to variation in microbiome compositions  
34 among co-occurring plant species. The data also allowed us to explore prokaryote and fungal  
35 lineages showing preferences for specific host characteristics. The list of microbial taxa  
36 showing significant host preferences involved those potentially having some impacts on  
37 survival, growth, or environmental resistance of host plants. Overall, this study provides a  
38 platform for understanding how plant and microbial communities are linked with each other  
39 at the ecosystem level.

40

41 Keywords: biodiversity, endophytes, host specificity, mycorrhizal fungi, plant-associated  
42 microbiomes: plant-soil feedbacks

43

## 44 INTRODUCTION

45 Plants interact with various taxonomic groups of microbes both in the phyllosphere and  
46 rhizosphere (van der Heijden et al., 1998; Berendsen et al., 2012; Bai et al., 2015; Peay et al.,  
47 2016). Diverse bacteria and yeasts, for example, are present on leaf surfaces, involved in  
48 underappreciated metabolic pathways (Mercier and Lindow, 2000; Delmotte et al.,  
49 2009; Hacquard et al., 2015). In addition to those epiphytes, a number of bacteria and  
50 filamentous fungi are known to inhabit leaf tissue, potentially playing pivotal roles in  
51 resistance of host plants against biotic and abiotic environmental stresses (Schardl and  
52 Phillips, 1997; Arnold et al., 2003). In root systems, mycorrhizal fungi provide plants with soil  
53 phosphorus and/or nitrogen, fueling hosts' growth (Parniske, 2008; Smith and Read,  
54 2008; Tedersoo et al., 2010). Likewise, some endophytic fungal taxa have known to convert  
55 organic forms of nitrogen into inorganic forms, contributing to physiological conditions of  
56 host plants (Newsham, 2011). Moreover, endophytic bacteria and fungi associated with roots  
57 can increase disease resistance of host plants, possibly by stimulating host immune systems  
58 (Ramamoorthy et al., 2001; Pieterse et al., 2014; Hacquard et al., 2017) or by suppressing soil  
59 pathogens with antibiotic chemicals (Compant et al., 2005; Gao et al., 2010). Thus,  
60 understanding of the compositions of plant microbiomes is a prerequisite for understanding  
61 the physiology and ecology of plants in terrestrial ecosystems (van der Heijden et al.,  
62 2008; Schlaeppli and Bulgarelli, 2015; Toju et al., 2018a).

63 While exploration of plant microbiomes has been accelerated since the emergence of  
64 high-throughput DNA sequencing (Öpik et al., 2009; Lundberg et al., 2012; Bai et al., 2015),  
65 we still have limited knowledge of how diverse plant species co-occurring in a grassland or  
66 forest ecosystem can differ in their microbiome compositions (Toju et al., 2016a). Moreover,  
67 most plant microbiome studies target only bacteria or fungi [but see (Agler et al., 2016)] in  
68 either above- or below-ground systems [but see (Bai et al., 2015; Wagner et al., 2016)],  
69 precluding comprehensive understanding of microbiome compositions. Given that bacteria  
70 and fungi can interact with each other within hosts (Frey-Klett et al., 2007; Hoffman and  
71 Arnold, 2010) and that above- and below-ground ecological processes can be interlinked  
72 (Bever et al., 2010; Mangan et al., 2010; Van der Putten et al., 2013), the targets of plant

73 microbiome studies need to be expanded towards a better understanding of the processes that  
74 organize plant and microbial communities in the wild. Studies comparing microbiome  
75 compositions across tens (or more) of plant species co-occurring in natural ecosystems (Toju  
76 et al., 2014; Toju et al., 2018b), in particular, will allow us to examine what kinds of host  
77 properties can contribute to the organization of leaf- and root-associated microbial  
78 communities.

79 In this study, we sampled leaves and roots of 138 plant species representing 112 genera,  
80 55 families, and 33 orders in a cool-temperate grassland in Japan, thereby performing a high-  
81 throughput sequencing analysis of both prokaryote and fungal communities associated with  
82 plants. The sample set of diverse plant species allowed us to examine what host properties can  
83 contribute to variation in leaf and root microbiome compositions in an ecosystem.  
84 Furthermore, we statistically tested how each prokaryote or fungal genus showed preferences  
85 for seasons as well as preference for nativeness (native or alien), lifeform (herbaceous or  
86 woody), and mycorrhizal type (ectomycorrhizal, arbuscular mycorrhizal, non-mycorrhizal, or  
87 variable mycorrhizal) of host plants. Overall, this study, for the first time, shows how more  
88 than 100 plant species in a single ecosystem can differ in their leaf and root microbiome  
89 compositions depending on their characteristics. The statistical results on plant–microbe  
90 associations shed light on underappreciated diversity of host–symbiont associations in  
91 grasslands, providing fundamental information for conserving and restoring terrestrial  
92 ecosystems.

93

## 94 **MATERIALS AND METHODS**

### 95 **Sampling**

96 Fieldwork was conducted in Sugadaira Research Station, Mountain Science Center,  
97 University of Tsukuba, Sugadaira, Ueda, Nagano Prefecture, Japan (36.524 °N; 138.349 °E;  
98 1340 m asl). In Sugadaira Research Station, 6 ha of a semi-natural grassland has been  
99 maintained by mowing plants in autumn and thereby preventing the community succession to  
100 a forest. Thus, woody plant species that occurred in the grassland are shrubs or saplings of tall

101 trees colonized from surrounding forests. In total, 200 plant species have been reported from  
102 the grassland, including some alien species.

103 In the grassland, both native and alien plant species were sampled to reveal the  
104 compositions of prokaryote and fungal communities associated with leaves and roots through  
105 summer and autumn (July 19-20, August 16-18, and September 7-8) in 2017. We targeted  
106 only non-reproductive plant individuals that had neither flower buds, flowers, nor fruits so  
107 that plant physiology and chemistry would not be affected by reproduction. We tried to  
108 sample as many plant species as possible within the sampling days in each month. Note that  
109 root systems of multiple plant species were tangled with each other at the study site due to the  
110 dominance of perennial plants. Therefore, we sampled 1–8 liters of soil including root  
111 systems for each target plant individuals and quickly washed the root system in a nearby  
112 laboratory to carefully trace root tips directly connected to above-ground tissue of the target  
113 plant. A 1-cm<sup>2</sup> disc of a mature leaf and a 2-cm segment of a terminal root were collected  
114 from each plant sample and preserved at -20 °C until DNA extraction. After the sampling,  
115 remaining plant organs of rare plant species were replaced at the original sampling positions.  
116 In total, 289 plant individuals representing 138 plant species (112 genera, 55 families, 33  
117 orders) were collected (Supplementary Data 1). The permission of sampling was issued by  
118 Sugadaira Research Station, Mountain Science Center, University of Tsukuba.

119

## 120 **DNA Extraction, PCR, and Sequencing**

121 Each leaf or root sample was surface-sterilized by immersing it in  $\times 1/100$  NaClO (Nacalai  
122 Tesque) for 1 min and it was subsequently washed in ethanol twice. DNA extraction was  
123 extracted with a cetyltrimethylammonium bromide (CTAB) method after pulverizing the roots  
124 with 4 mm zirconium balls at 25 Hz for 3 min using a TissueLyser II (Qiagen) (Toju et al.,  
125 2013).

126 For each of the leaf and root samples, the 16S rRNA V4 region of the prokaryotes and the  
127 internal transcribed spacer 1 (ITS1) region of fungi were amplified. The PCR of the 16S  
128 rRNA region was performed with the forward primer 515f (Caporaso et al., 2011) fused with

129 3–6-mer Ns for improved Illumina sequencing quality (Lundberg et al., 2013) and the forward  
130 Illumina sequencing primer (5'- TCG TCG GCA GCG TCA GAT GTG TAT AAG AGA  
131 CAG- [3–6-mer Ns] – [515f] -3') and the reverse primer 806rB (Apprill et al., 2015) fused  
132 with 3–6-mer Ns and the reverse sequencing primer (5'- GTC TCG TGG GCT CGG AGA  
133 TGT GTA TAA GAG ACA G [3–6-mer Ns] - [806rB] -3') (0.2  $\mu$ M each). To prevent the  
134 amplification of mitochondrial and chloroplast 16S rRNA sequences of host plants, specific  
135 peptide nucleic acids [mPNA and pPNA; Lundberg et al. (2013)] (0.7  $\mu$ M each) were added  
136 to the reaction mix of KOD FX Neo (Toyobo). The temperature profile of the PCR was 94 °C  
137 for 2 min, followed by 35 cycles at 98 °C (denaturation) for 10 s, 78 °C (annealing of PNA)  
138 for 10 s, 60 °C (annealing of primers) for 30 s, and 68 °C (extension) for 50 s, and a final  
139 extension at 68 °C for 5 min. To prevent generation of chimeric sequences, the ramp rate  
140 through the thermal cycles was set to 1 °C/sec (Stevens et al., 2013). Illumina sequencing  
141 adaptors were then added to respective samples in the supplemental PCR using the forward  
142 fusion primers consisting of the P5 Illumina adaptor, 8-mer indexes for sample identification  
143 (Hamady et al., 2008) and a partial sequence of the sequencing primer (5'- AAT GAT ACG  
144 GCG ACC ACC GAG ATC TAC AC - [8-mer index] - TCG TCG GCA GCG TC -3') and the  
145 reverse fusion primers consisting of the P7 adaptor, 8-mer indexes, and a partial sequence of  
146 the sequencing primer (5'- CAA GCA GAA GAC GGC ATA CGA GAT - [8-mer index] -  
147 GTC TCG TGG GCT CGG -3'). KOD FX Neo was used with a temperature profile of 94 °C  
148 for 2 min, followed by 8 cycles at 98 °C for 10 s, 55 °C for 30 s, and 68 °C for 50 s (ramp rate  
149 = 1 °C/s), and a final extension at 68 °C for 5 min. The PCR amplicons of the samples were  
150 then pooled after a purification/equalization process with the AMPureXP Kit (Beckman  
151 Coulter). Primer dimers, which were shorter than 200 bp, were removed from the pooled  
152 library by supplemental purification with AMPureXP: the ratio of AMPureXP reagent to the  
153 pooled library was set to 0.6 (v/v) in this process.

154 The PCR of fungal ITS1 region was performed with the forward primer ITS1F\_KYO1  
155 (Toju et al., 2012) fused with 3–6-mer Ns for improved Illumina sequencing quality  
156 (Lundberg et al., 2013) and the forward Illumina sequencing primer (5'- TCG TCG GCA  
157 GCG TCA GAT GTG TAT AAG AGA CAG- [3–6-mer Ns] – [ITS1F\_KYO1] -3') and the

158 reverse primer ITS2\_KYO2 (Toju et al., 2012) fused with 3–6-mer Ns and the reverse  
159 sequencing primer (5'- GTC TCG TGG GCT CGG AGA TGT GTA TAA GAG ACA G [3–6-  
160 mer Ns] - [ITS2\_KYO2] -3'). The buffer and polymerase system of KOD FX Neo was used  
161 with a temperature profile of 94 °C for 2 min, followed by 35 cycles at 98 °C for 10 s, 58 °C  
162 for 30 s, and 68 °C for 50 s, and a final extension at 68 °C for 5 min. Illumina sequencing  
163 adaptors and 8-mer index sequences were then added in the second PCR as described above.  
164 The amplicons were purified and pooled as described above.

165 The sequencing libraries of the prokaryote 16S and fungal ITS regions were processed in  
166 an Illumina MiSeq sequencer (run center: KYOTO-HE; 15% PhiX spike-in). Because the  
167 quality of forward sequences is generally higher than that of reverse sequences in Illumina  
168 sequencing, we optimized the MiSeq run setting in order to use only forward sequences.  
169 Specifically, the run length was set 271 forward (R1) and 31 reverse (R4) cycles to enhance  
170 forward sequencing data: the reverse sequences were used only for discriminating between  
171 16S and ITS1 sequences based on the sequences of primer positions.

172

## 173 **Bioinformatics**

174 The raw sequencing data were converted into FASTQ files using the program bcl2fastq 1.8.4  
175 distributed by Illumina. The output FASTQ files were demultiplexed with the program  
176 Claident v0.2. 2018.05.29 (Tanabe and Toju, 2013; Tanabe, 2018), by which sequencing reads  
177 whose 8-mer index positions included nucleotides with low (< 30) quality scores were  
178 removed. Only forward sequences were used in the following analyses after removing low-  
179 quality 3'-ends using Claident. Noisy reads (Tanabe, 2018) were subsequently discarded and  
180 then denoised dataset consisting of 2,973,811 16S and 2,774,197 ITS1 reads were obtained.  
181 The sequencing data were deposited to DNA Data Bank of Japan (DDBJ) (DRA007062).

182 For each dataset of 16S and ITS1 regions, filtered reads were clustered with a cut-off  
183 sequencing similarity of 97% using the program VSEARCH (Rognes et al., 2014) as  
184 implemented in Claident. The operational taxonomic units (OTUs) representing less than 10  
185 sequencing reads were subsequently discarded (Supplementary Data 2). The molecular



186 identification of the remaining OTUs was performed based on the combination of the query-  
187 centric auto-*k*-nearest neighbor (QCauto) method (Tanabe and Toju, 2013) and the lowest  
188 common ancestor (LCA) algorithm (Huson et al., 2007) as implemented in Claident  
189 (Supplementary Data 2). Note that taxonomic identification results based on the combination  
190 of the QCauto search and the LCA taxonomic assignment are comparable to, or sometimes  
191 more accurate than, those with alternative approaches (Tanabe and Toju, 2013; Toju et al.,  
192 2016a; Toju et al., 2016b).

193 For each combination of target region (16S or ITS1) and sample type (root or soil), we  
194 obtained a sample  $\times$  OTU matrix, in which a cell entry depicted the number of sequencing  
195 reads of an OTU in a sample (Supplementary Data 3). The cell entries whose read counts  
196 represented less than 0.1% of the total read count of each sample were removed to minimize  
197 effects of PCR/sequencing errors (Peay et al., 2015). The filtered matrix was then rarefied to  
198 500 reads per sample using the “rrarefy” function of the vegan 2.5-2 package (Oksanen et al.,  
199 2012) of R 3.5.1 (R-Core-Team, 2018). Samples with less than 500 reads were discarded in  
200 this process: the numbers of OTUs in the rarefied sample  $\times$  OTU matrices were 1,470, 5,638,  
201 1,537, and 3,367 for leaf prokaryote, root prokaryote, leaf fungal, and root fungal datasets,  
202 respectively (Supplementary Data 4). For each dataset, we also obtained order- and genus-  
203 level matrices, which represented order- and genus-level taxonomic compositions of microbes  
204 (prokaryotes or fungi), respectively (Supplementary Data 5).

205

## 206 **Prokaryote and Fungal Diversity**

207 Relationships between the number of sequencing reads and that of detected OTUs were  
208 examined for respective data matrices (leaf prokaryote, root prokaryote, leaf fungal, and root  
209 fungal datasets) with the “rarecurve” function of the R vegan package. Likewise, relationships  
210 between the number of samples and that of prokaryote/fungal orders or genera were examined  
211 with the vegan “specaccum” function. The order-level taxonomic compositions of leaf  
212 prokaryotes, root prokaryotes, leaf fungi, and root fungi were visualized in bar graphs for  
213 respective plant orders.

214

## 215 **Factors Contributing to Microbiome Compositions**

216 For each dataset (leaf prokaryote, root prokaryote, leaf fungal, or root fungal dataset), factors  
217 contributing to microbial community compositions were examined with the permutational  
218 analysis of variance [PERMANOVA; Anderson (2001)] using the vegan “adonis” function  
219 (10,000 permutations). Sampling month (July, August, or September) and four variables  
220 representing host plant properties were included as explanatory variables. Specifically, order-  
221 level plant taxonomy, plant nativeness (native or alien), plant lifeform (herbaceous or woody),  
222 and plant mycorrhizal type [ectomycorrhizal (EcM), arbuscular mycorrhizal (AM), non-  
223 mycorrhizal (NM), or variable mycorrhizal (NM-AM)] (Brundrett, 2009) were included as  
224 variables representing host properties. In each model, a matrix representing order- or genus-  
225 level taxonomic compositions of prokaryotes/fungi was used as the input response matrix.  
226 The “Bray-Curtis” metric of  $\beta$ -diversity was used in the PERMANOVA analyses.

227

## 228 **Randomization Analyses of Preferences**

229 To explore prokaryote/fungal genera that preferentially occurred on plant samples with  
230 specific properties, a series of randomization tests were performed. In each genus-level matrix  
231 (leaf prokaryote, root prokaryote, leaf fungal, or root fungal genus-level matrix), sample  
232 information was shuffled among plant samples (100,000 permutations) and then preference of  
233 a prokaryote/fungal genus ( $i$ ) for a sample property ( $j$ ) was evaluated as follows:

$$234 \quad \textit{Preference} (i, j) = [N_{\text{observed}} (i, j) - \text{Mean} (N_{\text{randomized}} (i, j))] / \text{SD} (N_{\text{randomized}} (i, j)),$$

235 where  $N_{\text{observed}} (i, j)$  denoted the mean number of the sequencing reads of genus  $i$  among  
236 property  $j$  samples in the original data, and the  $\text{Mean} (N_{\text{randomized}} (i, j))$  and  $\text{SD} (N_{\text{randomized}} (i,$   
237  $j))$  were the mean and standard deviation of the number of sequencing reads for the focal  
238 genus–sample property combination across randomized matrices. Based on the index,  
239 preferences for sampling month (July, August, or September), plant nativeness (native or  
240 alien), plant lifeform (herbaceous or woody), and plant mycorrhizal type were examined,

241 respectively. Because most plant orders included a few plant species in our datasets, the  
242 preference analysis was not applied to plant taxonomy. Regarding this standardized  
243 preference index, values larger than three generally represent strong preferences [false  
244 discovery rate (FDR) < 0.05; Toju et al. (2016a)]: hence, we listed genera whose preference  
245 values exceeded three.

246

## 247 **RESULTS**

### 248 **Prokaryote and Fungal Diversity**

249 After a series of quality filtering and rarefaction procedures, 41.1 (SD = 22.1), 143.4 (SD =  
250 37.9), 54.5 (SD = 18.8), and 46.0 (SD = 22.5) OTUs per sample, on average, were detected,  
251 from the leaf prokaryote, root prokaryote, leaf fungal, and root fungal datasets, respectively  
252 (Supplementary Fig. 1). The numbers of prokaryote orders and genera were higher in root  
253 samples than in leaf samples, while those of fungal orders and genera showed opposite  
254 patterns (Fig. 2).

255 The leaf prokaryote communities of the examined plants were dominated by the order  
256 Rhizobiales, while diverse bacterial taxa constituted the root prokaryote communities (Fig.  
257 3A-B). In the leaf fungal communities, the order Capnodiales were the most abundant, while  
258 root fungal community compositions varied considerably among host plant orders (Fig. 3C-  
259 D).

260

### 261 **Factors Contributing to Microbiome Compositions**

262 In the PERMANOVA, sampling month had significant effects on the leaf prokaryote, root  
263 prokaryote, and leaf fungal community compositions but not on the root fungal community  
264 structure (Table 1; Supplementary Table 1). Meanwhile, order-level host taxonomy influenced  
265 the root prokaryote, leaf fungal, and the root fungal community compositions but not the leaf  
266 prokaryote community structure (Table 1). The nativeness of host plants (native or alien) had

267 significant impacts on the root prokaryote and the root fungal (genus-level) community  
268 compositions (Table 1). The analysis also showed that host plant lifeform (herbaceous or  
269 woody) had significant effects on the leaf fungal community structure (Table 1).

270

## 271 **Randomization Analyses of Preferences**

272 In the randomization analyses, the relative abundances of four bacterial and eight fungal  
273 genera changed through the sampling months (Table 2). For example, the fungal genera  
274 *Leucosporidium*, *Taphrina*, and *Dioszegia* in the leaf fungal community appeared  
275 preferentially in July, while the bacterial genera *Amnibacterium*, *Spirosoma*, and  
276 *Hymenobacter* preferentially occurred in September (Table 2). Regarding the nativeness of  
277 hosts, 14 bacterial and 23 fungal genera showed preferences for alien plant species (Table 3).  
278 The list of bacterial genera with preferences for alien plant species included *Deinococcus*,  
279 *Dermacoccus*, *Rubrobacter*, *Brevundimonas*, *Paraburkholderia*, and *Virgisporangium*, while  
280 that of fungal genera showing preferences for alien plants involved *Phoma*, *Hymenoscyphus*,  
281 *Sakaguchia*, *Didymella*, *Curvularia*, *Cylindrocarpon*, and *Meliniomyces* (Table 3). In contrast,  
282 two bacterial genera, *Actinoallomurus* and *Singulisphaera* showed preferences for native  
283 plant species (Table 3). The randomization analyses also indicated that two bacterial (*Massilia*  
284 and *Steroidobacter*) and four fungal (*Veronaea*, *Lophiostoma*, *Agrocybe*, and *Leptodontidium*)  
285 genera occurred preferentially on woody plant species (Supplementary Table 2). Although  
286 mycorrhizal type of host plants did not have significant effects in the community-level  
287 statistical analysis (Table 1), a number of bacterial and fungal genera showed preferences for  
288 host mycorrhizal type (Table 4; Supplementary Table 3). For example, the bacterial genera  
289 *Ferrimicrobium*, *Kineococcus*, *Sandarakinorhabdus*, and *Microthrix* showed preferences for  
290 non-mycorrhizal plant species, while *Flavisolibacter*, *Neochlamydia*, and *Phenylobacterium*  
291 showed preferences for ectomycorrhizal plants (Table 4). Fungi in the genera *Colletotrichum*,  
292 *Entorrhiza*, *Mycoarthritis*, and *Sugiyamaella*, for instance, occurred preferentially on non-  
293 mycorrhizal plants, while not only ectomycorrhizal fungal genera (*Laccaria* and *Tomentella*)  
294 but also potentially endophytic fungal genera such as *Phialocephala* and *Oidiodendron*

295 appeared preferentially on ectomycorrhizal plant species (Table 4; Supplementary Table 3).  
296 Bacteria and fungi with preferences for arbuscular mycorrhizal plants were not detected in the  
297 present randomization analyses presumably due to the dominance of arbuscular mycorrhizal  
298 plants within the datasets (see Discussion).

299

## 300 **DISCUSSION**

301 Based on a high-throughput sequencing dataset, we herein compared leaf and root  
302 microbiome compositions across co-occurring plant species in a temperate grassland. By  
303 targeting one of the most plant-species-rich ecosystems in the cool-temperate climate, we  
304 compared leaf- and root-associated microbial communities across 33 plant orders (Fig. 3) and  
305 then performed a series of statistical analyses on factors that may influence community  
306 compositions of plant-associated microbes (Tables 1–4). Hereafter, we discuss potential  
307 contributions of the factors examined, focusing on preferences of each microbial taxon for  
308 host characteristics.

309 An interesting finding of this study is that, while the compositions of leaf prokaryote, root  
310 prokaryote, and leaf fungal communities changed through the sampling months, root fungal  
311 community compositions did not significantly shift during the period (Tables 1–2). This  
312 pattern possibly represents difference in basic environmental features between above- and  
313 below-ground systems and/or difference in phenological patterns between prokaryote and  
314 fungal communities. For example, above-ground biotic/abiotic environments may be more  
315 dynamics than below-ground environments, resulting in rapid turnover of microbial  
316 communities. Moreover, above-ground parts of plants are more likely to be accessed by wind-  
317 dispersed spores and inocula than below-ground parts: hence, above-ground microbiome  
318 processes may be susceptible to continual immigration. In addition to potential contrasting  
319 features of above- vs. below-ground systems, difference in basic ecology between bacteria  
320 and fungi may have contributed to the varied phenological patterns. While mycorrhizal and  
321 endophytic fungi usually persist on/around host root systems in the form of hyphal networks  
322 (Lian et al., 2006; Smith and Read, 2008), bacterial communities may consist mainly of

323 opportunistic symbionts [*sensu* (Hardoim et al., 2008)], which undergo rapid population  
324 growth under favorable environmental conditions and are subsequently replaced by others.  
325 Year-round comparative studies on leaf and root microbiomes are awaited for gaining more  
326 comprehensive understandings of microbiome dynamics.

327       Among the microbial communities examined, both root-associated prokaryote and fungal  
328 communities significantly varied between native and alien plant species (Table 1). The  
329 randomization analysis then allowed us to screen for bacterial and fungal genera showing  
330 preferences for native or alien plants (Table 3). Among the bacterial genera showing  
331 preferences for alien plants, *Paraburkholderia* has been known to include species with  
332 nitrogen-fixing abilities (Dall'Agnol et al., 2016), potentially influencing host nutritional  
333 conditions. In addition, the analysis showed that various genera in the phylum Actinobacteria  
334 (*Rubrobacter*, *Dermacoccus*, *Actinoallomurus*, and *Virgisporangium*) showed preferences for  
335 native or alien plant species. Given that many actinomycete bacteria produce chemicals  
336 suppressing other microbes (Qin et al., 2011; Bérdy, 2012), their ecological roles in  
337 ecosystems are of particular interest. For fungi, although the absence of OTUs displaying  
338 preferences for native plants requires careful interpretation (see below), the randomization  
339 analysis showed that various fungal taxa could have preferences for alien plant species (Table  
340 3). Among them, *Curvularia*, *Didymella*, and *Cylindrocarpon* include well-characterized plant  
341 pathogenic species (Alaniz et al., 2007; Akinbode, 2010; Keinath, 2011). In contrast, fungi in  
342 the genus *Meliniomyces* have been described as mycorrhizal or endophytic fungi (Hambleton  
343 and Sigler, 2005; Ohtaka and Narisawa, 2008; Vohník et al., 2013), possibly contributing to the  
344 survival and growth of host plants. Overall, these results suggest that various taxonomic  
345 groups of bacteria and fungi are associated with native or alien plant species, potentially  
346 affecting invasiveness of alien plants both positively and negatively.

347       At the whole community level, mycorrhizal types of host plants did not have significant  
348 effects on plant microbiome compositions, while effects of plant lifeform (herbaceous or  
349 woody) were significant in one of the communities examined (i.e., leaf fungal community)  
350 (Table 1; Supplementary Table 3). However, the randomization analysis for respective  
351 microbial taxa highlighted diverse bacterial and fungal genera showing statistically significant

352 preferences for host mycorrhizal types (Table 4). Among the bacteria showing preferences for  
353 non-mycorrhizal plants, *Ferrimicrobium* includes species adapted to low pH conditions  
354 (Johnson et al., 2009), while the genus *Kineococcus* is known to involve species tolerant to  
355 salt stress (Bian et al., 2012). Within the fungal community, ectomycorrhizal fungi in the  
356 genera *Laccaria* and *Tomentella* showed preferences for ectomycorrhizal plant species as  
357 expected based on previous studies on mycorrhizal symbioses (Smith and Read,  
358 2008; Tedersoo et al., 2010). We also found that possibly endophytic fungi in the genus  
359 *Phialocephala* (Fernando and Currah, 1996; Grünig et al., 2008) showed preferences for  
360 ectomycorrhizal plants. Among the fungal genera showing preferences for non-mycorrhizal  
361 plant roots, *Colletotrichum* is of particular interest. Although many *Colletotrichum* species  
362 had been known as plant pathogens (Hammerschmidt et al., 1982; O'Connell et al., 2012),  
363 recent studies have demonstrated that some species in the genus could work as mutualistic  
364 symbionts by providing soil phosphorus to non-mycorrhizal plants such as *Arabidopsis*  
365 *thaliana* (Hiruma et al., 2016; Hiruma et al., 2018). Thus, the list of microbes preferentially  
366 associated with non-mycorrhizal plants (Table 4; Supplementary Table 3) sheds light on  
367 potential diversity of bacteria and fungi that may partly fill niches of mycorrhizal fungi in  
368 non-mycorrhizal plant species.

369         Although the data collected in this study provide fundamental information of microbial  
370 diversity in a grassland ecosystem, the statistical results should be interpreted with caution.  
371 First, the small number of samples per plant species may have affected the comparison of  
372 microbiome compositions among plant taxa (Fig. 3). The identification of plant roots is time-  
373 consuming especially in species-rich grasslands consisting mainly of perennial plants with  
374 tangled root systems, limiting the throughput of sampling. Therefore, for more comprehensive  
375 profiling of plant microbiomes, we may need to increase the throughput of plant species  
376 identification based on molecular taxonomic assignment (i.e., DNA barcoding) of host plants  
377 (Hollingsworth et al., 2009; Toju et al., 2013). Second, the presence of unidentified bacteria  
378 and fungi in the dataset may have biased the statistical analyses. Although databases of  
379 microbes have been continually updated, there remain many bacterial and fungal lineages  
380 whose taxonomy has not yet been fixed. In particular, below-ground microbiomes are known



381 to involve a number of poorly investigated taxa, whose physiological and ecological functions  
382 remain to be uncovered (Buée et al., 2009;Fierer, 2017). Thus, with more reference microbial  
383 databases, we will be able to examine whether the patterns found in the present analysis hold  
384 after assigning unidentified OTUs to right categories. Third, there seems limitation of the  
385 randomization method used in this study. In the analysis of host plant nativeness, significant  
386 preferences for native plant species were detected only for a few microbial genera (Table 3).  
387 Likewise, in the analysis on plant mycorrhizal types, there was no microbial genus showing  
388 preferences for arbuscular mycorrhizal plants (Table 4). Given that native and arbuscular  
389 mycorrhizal plant species were dominant in the grassland [87.9 % (254/289) and 87.5 %  
390 (253/289) of samples, respectively], this kind of randomization analyses may tend to provide  
391 conservative results for major categories, while yielding sensitive results for categories with  
392 smaller number of samples. Although randomization methods require fewer statistical  
393 assumptions than model-based methods [e.g., (Sato et al., 2015)], they may be more suitable  
394 for data matrices with equal number of replicate samples across target categories.

395 We herein revealed how diverse bacterial and fungal taxa were associated with leaves and  
396 roots of the 138 plant species co-occurring in a cool-temperate grassland, focusing on  
397 potential contributions of host plant characteristics on microbiome compositions. Although  
398 recent ecological studies have highlighted possible feedbacks between plant and microbial  
399 community dynamics (Bever et al., 2010;Mangan et al., 2010;Van der Putten et al., 2013), we  
400 still have limited knowledge of the processes by which species-rich plant communities are  
401 maintained by phyllosphere and rhizosphere microbiomes. Accumulating comprehensive  
402 inventory data of microbiomes associated with whole plant communities is a prerequisite for  
403 advancing our understanding of ecosystem-scale processes. Case studies in various types of  
404 terrestrial ecosystems in diverse climatic regions will allow us to elucidate how plant species  
405 with different mycorrhizal types often coexist in natural ecosystems (Booth, 2004;Kadowaki  
406 et al., in press) or why some ecosystems are resistant against alien plants, while others are  
407 heavily disturbed by invasive species (Mitchell and Power, 2003;Reinhart and Callaway,  
408 2006).

409



## 410 AUTHOR CONTRIBUTIONS

411 HT, HK, and TK designed the work. HT, HK, and TK performed fieldwork. HT conducted  
412 molecular experiment and analyzed the data. HT, HK, and TK wrote the manuscript.

413

## 414 ACKNOWLEDGEMENTS

415 We thank Qing-Wei Wang, Yuka Yamamoto, and Rie Watanabe for their help in fieldwork and  
416 Sarasa Amma and Hiroki Kawai for their support in molecular experiments. This work was  
417 financially supported by JST PRESTO (JPMJPR16Q6) to HT. This work was financially  
418 supported by JST PRESTO (JPMJPR16Q6) to HT, by the JSPS Grant-in-Aid for Scientific  
419 Research (B) Grant number JP17H03736 to HK, and by the promotion cost for functional  
420 enhancement of the Mountain Science Center to TK.

421

## 422 SUPPLEMENTARY MATERIAL

423 The Supplementary Material for this article can be found online at [XXXXXX](#).

424

## 425 REFERENCES

426 Agler, M.T., Ruhe, J., Kroll, S., Morhenn, C., Kim, S.-T., Weigel, D., et al. (2016). Microbial  
427 hub taxa link host and abiotic factors to plant microbiome variation. *PLOS Biol.* 14,  
428 e1002352. doi: 10.1371/journal.pbio.1002352

429 Akinbode, O. (2010). Evaluation of antifungal efficacy of some plant extracts on *Curvularia*  
430 *lunata*, the causal organism of maize leaf spot. *African J. ENc. Sci. Tech.* 4, 797-800.  
431 doi:

432 Alaniz, S., León, M., Vicent, A., García-Jiménez, J., Abad-Campos, P., and Armengol, J.  
433 (2007). Characterization of *Cylindrocarpon* species associated with black foot disease  
434 of grapevine in Spain. *Plant Disease* 91, 1187-1193. doi:

435 Anderson, M.J. (2001). A new method for non-parametric multivariate analysis of variance.

- 436 *Austral Ecol.* 26, 32-46. doi: 10.1111/j.1442-9993.2001.01070.pp.x
- 437 Apprill, A., McNally, S., Parsons, R., and Weber, L. (2015). Minor revision to V4 region SSU  
438 rRNA 806R gene primer greatly increases detection of SAR11 bacterioplankton. doi:  
439 10.3354/ame01753
- 440 Arnold, A.E., Mejía, L.C., Kyllö, D., Rojas, E.I., Maynard, Z., Robbins, N., et al. (2003).  
441 Fungal endophytes limit pathogen damage in a tropical tree. *Proc. Natl. Acad. Sci.*  
442 *USA.* 100, 15649-15654. doi: 10.1073/pnas.2533483100
- 443 Bai, Y., Müller, D.B., Srinivas, G., Garrido-Oter, R., Potthoff, E., Rott, M., et al. (2015).  
444 Functional overlap of the *Arabidopsis* leaf and root microbiota. *Nature* 528, 364-369.  
445 doi: 10.1038/nature16192
- 446 Bérdy, J. (2012). Thoughts and facts about antibiotics: where we are now and where we are  
447 heading. *J. Antibiotics* 65, 385. doi:
- 448 Berendsen, R.L., Pieterse, C.M., and Bakker, P.A. (2012). The rhizosphere microbiome and  
449 plant health. *Trends Plant Sci.* 17, 478-486. doi: 10.1016/j.tplants.2012.04.001
- 450 Bever, J.D., Dickie, I.A., Facelli, E., Facelli, J.M., Klironomos, J., Moora, M., et al. (2010).  
451 Rooting theories of plant community ecology in microbial interactions. *Trends Ecol.*  
452 *Evol.* 25, 468-478. doi: 10.1016/j.tree.2010.05.004
- 453 Bian, G.-K., Feng, Z.-Z., Qin, S., Xing, K., Wang, Z., Cao, C.-L., et al. (2012). *Kineococcus*  
454 *endophytica* sp. nov., a novel endophytic actinomycete isolated from a coastal  
455 halophyte in Jiangsu, China. *Antonie van Leeuwenhoek* 102, 621-628. doi:
- 456 Booth, M.G. (2004). Mycorrhizal networks mediate overstorey-understorey competition in a  
457 temperate forest. *Ecol. Lett.* 7, 538-546. doi:
- 458 Brundrett, M.C. (2009). Mycorrhizal associations and other means of nutrition of vascular  
459 plants: understanding the global diversity of host plants by resolving conflicting  
460 information and developing reliable means of diagnosis. *Plant Soil* 320, 37-77. doi:  
461 10.1007/s11104-008-9877-9
- 462 Buée, M., Reich, M., Murat, C., Morin, E., Nilsson, R., Uroz, S., et al. (2009). 454  
463 Pyrosequencing analyses of forest soils reveal an unexpectedly high fungal diversity.  
464 *New Phytol.* 184, 449-456. doi: 10.1111/j.1469-8137.2009.03003.x

- 465 Caporaso, J.G., Lauber, C.L., Walters, W.A., Berg-Lyons, D., Lozupone, C.A., Turnbaugh,  
466 P.J., et al. (2011). Global patterns of 16S rRNA diversity at a depth of millions of  
467 sequences per sample. *Proc. Natl. Acad. Sci. USA*. 108, 4516-4522. doi:  
468 10.1073/pnas.1000080107
- 469 Compant, S., Duffy, B., Nowak, J., Clément, C., and Barka, E.A. (2005). Use of plant growth-  
470 promoting bacteria for biocontrol of plant diseases: principles, mechanisms of action,  
471 and future prospects. *Appl. Env. Microbiol.* 71, 4951-4959. doi:
- 472 Dall'agnol, R.F., Plotegher, F., Souza, R.C., Mendes, I.C., Dos Reis Junior, F.B., Béna, G., et  
473 al. (2016). *Paraburkholderia nodosa* is the main N<sub>2</sub>-fixing species trapped by  
474 promiscuous common bean (*Phaseolus vulgaris* L.) in the Brazilian 'Cerradão'. *FEMS*  
475 *Microbiol. Ecol.* 92, fiw108. doi:
- 476 Delmotte, N., Knief, C., Chaffron, S., Innerebner, G., Roschitzki, B., Schlapbach, R., et al.  
477 (2009). Community proteogenomics reveals insights into the physiology of  
478 phyllosphere bacteria. *Proc. Natl. Acad. Sci. USA* 106, 16428-16433. doi:
- 479 Fernando, A.A., and Currah, R.S. (1996). A comparative study of the effects of the root  
480 endophytes *Leptodontidium orchidicola* and *Phialocephala fortinii* (Fungi Imperfecti)  
481 on the growth of some subalpine plants in culture. *Can. J. Bot.* 74, 1071-1078. doi:
- 482 Fierer, N. (2017). Embracing the unknown: disentangling the complexities of the soil  
483 microbiome. *Nat. Rev. Microbiol.* 15, 579-590. doi:
- 484 Frey-Klett, P., Garbaye, J.A., and Tarkka, M. (2007). The mycorrhiza helper bacteria  
485 revisited. *New Phytol.* 176, 22-36. doi:
- 486 Gao, F.-K., Dai, C.-C., and Liu, X.-Z. (2010). Mechanisms of fungal endophytes in plant  
487 protection against pathogens. *African J. Microbiol. Res.* 4, 1346-1351. doi:
- 488 Grünig, C.R., Queloz, V., Sieber, T.N., and Holdenrieder, O. (2008). Dark septate endophytes  
489 (DSE) of the *Phialocephala fortinii* s.l. –*Acephala applanata* species complex in tree  
490 roots: classification, population biology, and ecology. *Botany* 86, 1355-1369. doi:
- 491 Hacquard, S., Garrido-Oter, R., González, A., Spaepen, S., Ackermann, G., Lebeis, S., et al.  
492 (2015). Microbiota and host nutrition across plant and animal kingdoms. *Cell Host*  
493 *Microbe* 17, 603-616. doi:

- 494 Hacquard, S., Spaepen, S., Garrido-Oter, R., and Schulze-Lefert, P. (2017). Interplay between  
495 innate immunity and the plant microbiota. *Ann. Rev. Phytopathol.* 55, 565-589. doi:
- 496 Hamady, M., Walker, J.J., Harris, J.K., Gold, N.J., and Knight, R. (2008). Error-correcting  
497 barcoded primers for pyrosequencing hundreds of samples in multiplex. *Nat. Methods*  
498 5, 235-237. doi: 10.1038/nmeth.1184
- 499 Hambleton, S., and Sigler, L. (2005). Meliniomyces, a new anamorph genus for root-  
500 associated fungi with phylogenetic affinities to *Rhizoscyphus ericae* ( $\equiv$   
501 *Hymenoscyphus ericae*), Leotiomycetes. *Studies Mycology* 53, 1-27. doi:
- 502 Hammerschmidt, R., Nuckles, E., and Kuć, J. (1982). Association of enhanced peroxidase  
503 activity with induced systemic resistance of cucumber to *Colletotrichum lagenarium*.  
504 *Physiol. Plant Pathol.* 20, 73-82. doi:
- 505 Hardoim, P.R., Van Overbeek, L.S., and Van Elsas, J.D. (2008). Properties of bacterial  
506 endophytes and their proposed role in plant growth. *Trends Microbiol.* 16, 463-471.  
507 doi:
- 508 Hiruma, K., Gerlach, N., Sacristán, S., Nakano, R.T., Hacquard, S., Kracher, B., et al. (2016).  
509 Root endophyte *Colletotrichum tofieldiae* confers plant fitness benefits that are  
510 phosphate status dependent. *Cell* 165, 464-474. doi:
- 511 Hiruma, K., Kobae, Y., and Toju, H. (2018). Beneficial associations between Brassicaceae  
512 plants and fungal endophytes under nutrient-limiting conditions: evolutionary origins  
513 and host-symbiont molecular mechanisms. *Current Opinion Plant Biol.* 44, 145-154.  
514 doi: 10.1016/j.pbi.2018.04.009
- 515 Hoffman, M.T., and Arnold, A.E. (2010). Diverse bacteria inhabit living hyphae of  
516 phylogenetically diverse fungal endophytes. *Appl. Env. Microbiol.* 76, 4063-4075. doi:
- 517 Hollingsworth, P.M., Forrest, L.L., Spouge, J.L., Hajibabaei, M., Ratnasingham, S., Van Der  
518 Bank, M., et al. (2009). A DNA barcode for land plants. *Proc. Natl. Acad. Sci. USA*  
519 106, 12794-12797. doi: 10.1073/pnas.0905845106
- 520 Huson, D.H., Auch, A.F., Qi, J., and Schuster, S.C. (2007). MEGAN analysis of metagenomic  
521 data. *Genome Res.* 17, 377-386. doi: 10.1101/gr.5969107
- 522 Johnson, D.B., Bacelar-Nicolau, P., Okibe, N., Thomas, A., and Hallberg, K.B. (2009).

- 523 Ferrimicrobium acidiphilum gen. nov., sp. nov. and Ferrithrix thermotolerans gen.  
524 nov., sp. nov.: heterotrophic, iron-oxidizing, extremely acidophilic actinobacteria. *Int.*  
525 *J. Syst. Evol. Microbiol.* 59, 1082-1089. doi:
- 526 Kadowaki, K., Yamamoto, S., Sato, H., Tanabe, A.S., Hidaka, A., and Toju, H. (in press).  
527 Mycorrhizal fungi mediate the direction and strength of plant-soil feedbacks  
528 differently between arbuscular mycorrhizal and ectomycorrhizal communities.  
529 *Commun. Biol.* doi:
- 530 Keinath, A.P. (2011). From native plants in central Europe to cultivated crops worldwide: the  
531 emergence of *Didymella bryoniae* as a cucurbit pathogen. *HortScience* 46, 532-535.  
532 doi:
- 533 Lian, C., Narimatsu, M., Nara, K., and Hogetsu, T. (2006). Tricholoma matsutake in a natural  
534 *Pinus densiflora* forest: correspondence between above-and below-ground genets,  
535 association with multiple host trees and alteration of existing ectomycorrhizal  
536 communities. *New Phytol.* 171, 825-836. doi:
- 537 Lundberg, D.S., Lebeis, S.L., Paredes, S.H., Yourstone, S., Gehring, J., Malfatti, S., et al.  
538 (2012). Defining the core *Arabidopsis thaliana* root microbiome. *Nature* 488, 86-90.  
539 doi: 10.1038/nature11237
- 540 Lundberg, D.S., Yourstone, S., Mieczkowski, P., Jones, C.D., and Dangl, J.L. (2013). Practical  
541 innovations for high-throughput amplicon sequencing. *Nat. Methods* 10, 999-1002.  
542 doi: 10.1038/nmeth.2634
- 543 Mangan, S.A., Schnitzer, S.A., Herre, E.A., Mack, K.M., Valencia, M.C., Sanchez, E.I., et al.  
544 (2010). Negative plant-soil feedback predicts tree-species relative abundance in a  
545 tropical forest. *Nature* 466, 752-755. doi: 10.1038/nature09273
- 546 Mercier, J., and Lindow, S. (2000). Role of leaf surface sugars in colonization of plants by  
547 bacterial epiphytes. *Appl. Env. Microbiol.* 66, 369-374. doi:
- 548 Mitchell, C.E., and Power, A.G. (2003). Release of invasive plants from fungal and viral  
549 pathogens. *Nature* 421, 625. doi:
- 550 Newsham, K.K. (2011). A meta-analysis of plant responses to dark septate root endophytes.  
551 *New Phytol.* 190, 783-793. doi: 10.1111/j.1469-8137.2010.03611.x

- 552 O'connell, R.J., Thon, M.R., Hacquard, S., Amyotte, S.G., Kleemann, J., Torres, M.F., et al.  
553 (2012). Lifestyle transitions in plant pathogenic *Colletotrichum* fungi deciphered by  
554 genome and transcriptome analyses. *Nat. Genetics* 44, 1060. doi:
- 555 Ohtaka, N., and Narisawa, K. (2008). Molecular characterization and endophytic nature of the  
556 root-associated fungus *Meliniomyces variabilis* (LtVB3). *J. General Plant Pathol.* 74,  
557 24-31. doi:
- 558 Oksanen, J., Blanachet, F.G., Kindt, R., Legendre, P., Minchin, P.R., O'hara, R.B., et al.  
559 (2012). "Vegan: community ecology package. R package version 2.0-3 available at  
560 <http://CRAN.R-project.org/package=vegan>".).
- 561 Öpik, M., Metsis, M., Daniell, T., Zobel, M., and Moora, M. (2009). Large-scale parallel  
562 sequencing reveals host ecological group specificity of arbuscular mycorrhizal fungi  
563 in a boreonemoral forest. *New Phytol.* 184, 424-437. doi: 10.1111/j.1469-  
564 8137.2009.02920.x
- 565 Parniske, M. (2008). Arbuscular mycorrhiza: the mother of plant root endosymbioses. *Nat.*  
566 *Rev. Microbiol.* 6, 763-775. doi:
- 567 Peay, K.G., Kennedy, P.G., and Talbot, J.M. (2016). Dimensions of biodiversity in the Earth  
568 mycobiome. *Nat. Rev. Microbiol.* 14, 434-447. doi: 10.1038/nrmicro.2016.59
- 569 Peay, K.G., Russo, S.E., Mcguire, K.L., Lim, Z., Chan, J.P., Tan, S., et al. (2015). Lack of host  
570 specificity leads to independent assortment of dipterocarps and ectomycorrhizal fungi  
571 across a soil fertility gradient. *Ecol. Lett.* 18, 807-816. doi: 10.1111/ele.12459
- 572 Pieterse, C.M., Zamioudis, C., Berendsen, R.L., Weller, D.M., Van Wees, S.C., and Bakker,  
573 P.A. (2014). Induced systemic resistance by beneficial microbes. *Ann. Rev.*  
574 *Phytopathol.* 52, 347-375. doi:
- 575 Qin, S., Xing, K., Jiang, J.-H., Xu, L.-H., and Li, W.-J. (2011). Biodiversity, bioactive natural  
576 products and biotechnological potential of plant-associated endophytic actinobacteria.  
577 *Appl. Microbiol. Biotech.* 89, 457-473. doi:
- 578 R-Core-Team (2018). "R 3.5.1: A language and environment for statistical computing  
579 available at <http://www.R-project.org/>". (Vienna, Austri: R Foundation for Statistical  
580 Computing).

- 581 Ramamoorthy, V., Viswanathan, R., Raguchander, T., Prakasam, V., and Samiyappan, R.  
582 (2001). Induction of systemic resistance by plant growth promoting rhizobacteria in  
583 crop plants against pests and diseases. *Crop Protection* 20, 1-11. doi:
- 584 Reinhart, K.O., and Callaway, R.M. (2006). Soil biota and invasive plants. *New Phytol.* 170,  
585 445-457. doi:
- 586 Rognes, T., Mahé, F., Flouri, T., Quince, C., and Nichols, B. (2014). "Vsearch: program  
587 available at <https://github.com/torognes/vsearch>".).
- 588 Sato, H., Tanabe, A.S., and Toju, H. (2015). Contrasting diversity and host association of  
589 ectomycorrhizal Basidiomycetes versus root-associated Ascomycetes in a dipterocarp  
590 rainforest. *PLOS ONE* 10, e0125550. doi: 10.1371/journal.pone.0125550
- 591 Schardl, C.L., and Phillips, T.D. (1997). Protective grass endophytes: where are they from and  
592 where are they going? *Plant Disease* 81, 430-438. doi:
- 593 Schlaeppi, K., and Bulgarelli, D. (2015). The plant microbiome at work. *Mol. Plant-Microbe*  
594 *Int.* 28, 212-217. doi: 10.1094/MPMI-10-14-0334-FI
- 595 Smith, S.E., and Read, D.J. (2008). *Mycorrhizal symbiosis*. New York: Academic press.
- 596 Stevens, J.L., Jackson, R.L., and Olson, J.B. (2013). Slowing PCR ramp speed reduces  
597 chimera formation from environmental samples. *J. Microbiol. Methods* 93, 203-205.  
598 doi: 10.1016/j.mimet.2013.03.013
- 599 Tanabe, A.S. (2018). *Claident v0.2.2018.05.29, a software distributed by author at*  
600 <http://www.fifthdimension.jp/>.
- 601 Tanabe, A.S., and Toju, H. (2013). Two new computational methods for universal DNA  
602 barcoding: a benchmark using barcode sequences of bacteria, archaea, animals, fungi,  
603 and land plants. *PLOS ONE* 8, e76910. doi: 10.1371/journal.pone.0076910
- 604 Tedersoo, L., May, T.W., and Smith, M.E. (2010). Ectomycorrhizal lifestyle in fungi: global  
605 diversity, distribution, and evolution of phylogenetic lineages. *Mycorrhiza* 20, 217-  
606 263. doi:
- 607 Toju, H., Guimarães, P.R., Jr, Olesen, J.M., and Thompson, J.N. (2014). Assembly of complex  
608 plant–fungus networks. *Nat. Commun.* 5, 5273. doi: 10.1038/ncomms6273



- 609 Toju, H., Peay, K.G., Yamamichi, M., Narisawa, K., Hiruma, K., Naito, K., et al. (2018a).  
610 Core microbiomes for sustainable agroecosystems. *Nat. Plants* 4, 247–257. doi:  
611 10.1038/s41477-018-0139-4
- 612 Toju, H., Tanabe, A., and Ishii, H. (2016a). Ericaceous plant–fungus network in a harsh  
613 alpine–subalpine environment. *Mol. Ecol.* 25, 3242–3257. doi: 10.1111/mec.13680
- 614 Toju, H., Tanabe, A.S., and Sato, H. (2018b). Network hubs in root-associated fungal  
615 metacommunities. *Microbiome* 6, 116. doi:
- 616 Toju, H., Tanabe, A.S., Yamamoto, S., and Sato, H. (2012). High-coverage ITS primers for the  
617 DNA-based identification of ascomycetes and basidiomycetes in environmental  
618 samples. *PLOS ONE* 7, e40863. doi: 10.1371/journal.pone.0040863
- 619 Toju, H., Yamamoto, S., Sato, H., Tanabe, A.S., Gilbert, G.S., and Kadowaki, K. (2013).  
620 Community composition of root-associated fungi in a *Quercus*-dominated temperate  
621 forest: “codominance” of mycorrhizal and root-endophytic fungi. *Ecol. Evol.* 3, 1281-  
622 1293. doi: 10.1002/ece3.546
- 623 Toju, H., Yamamoto, S., Tanabe, A.S., Hayakawa, T., and Ishii, H.S. (2016b). Network  
624 modules and hubs in plant-root fungal biome. *J. R. Soc. Interface* 13, 20151097. doi:  
625 10.1098/rsif.2015.1097
- 626 Van Der Heijden, M.G., Bardgett, R.D., and Van Straalen, N.M. (2008). The unseen majority:  
627 soil microbes as drivers of plant diversity and productivity in terrestrial ecosystems.  
628 *Ecol. Lett.* 11, 296–310. doi:
- 629 Van Der Heijden, M.G., Klironomos, J.N., Ursic, M., Moutoglis, P., Streitwolf-Engel, R.,  
630 Boller, T., et al. (1998). Mycorrhizal fungal diversity determines plant biodiversity,  
631 ecosystem variability and productivity. *Nature* 396, 69–72. doi:
- 632 Van Der Putten, W.H., Bardgett, R.D., Bever, J.D., Bezemer, T.M., Casper, B.B., Fukami, T.,  
633 et al. (2013). Plant–soil feedbacks: the past, the present and future challenges. *J. Ecol.*  
634 101, 265–276. doi:
- 635 Vohník, M., Mrnka, L., Lukešová, T., Bruzone, M.C., Kohout, P., and Fehrer, J. (2013). The  
636 cultivable endophytic community of Norway spruce ectomycorrhizas from  
637 microhabitats lacking ericaceous hosts is dominated by ericoid mycorrhizal  
638 *Meliniomyces variabilis*. *Fungal Ecol.* 6, 281–292. doi:



639 Wagner, M.R., Lundberg, D.S., Tijana, G., Tringe, S.G., Dangl, J.L., and Mitchell-Olds, T.  
640 (2016). Host genotype and age shape the leaf and root microbiomes of a wild  
641 perennial plant. *Nature Commun.* 7, 12151. doi:

642

643 **Conflict of Interest Statement:** The authors declare that the research was conducted in the  
644 absence of any commercial or financial relationships that could be constructed as conflict of  
645 interest.

646

647 **TABLE 1** | Factors contributing to variation in genus-level community compositions of  
 648 bacteria and fungi.

649

| Target      | Plant tissue | Taxonomic level | Variable         | df | F.model | R <sup>2</sup> | P             |
|-------------|--------------|-----------------|------------------|----|---------|----------------|---------------|
| Prokaryotes | Leaf         | Genus           | Month            | 1  | 3.62    | 0.019          | <b>0.0070</b> |
|             |              |                 | Order            | 31 | 1.37    | 0.218          | 0.0140        |
|             |              |                 | Native/alien     | 1  | 1.34    | 0.007          | 0.2159        |
|             |              |                 | Woody/herbaceous | 1  | 0.93    | 0.005          | 0.4221        |
|             |              |                 | Mycorrhizal type | 3  | 1.58    | 0.024          | 0.0821        |
|             | Root         | Genus           | Month            | 1  | 3.35    | 0.011          | <b>0.0005</b> |
|             |              |                 | Order            | 32 | 1.99    | 0.217          | <b>0.0001</b> |
|             |              |                 | Native/alien     | 1  | 2.63    | 0.009          | <b>0.0041</b> |
|             |              |                 | Woody/herbaceous | 1  | 1.32    | 0.005          | 0.1824        |
|             |              |                 | Mycorrhizal type | 3  | 0.92    | 0.009          | 0.5768        |
| Fungi       | Leaf         | Genus           | Month            | 1  | 13.35   | 0.056          | <b>0.0001</b> |
|             |              |                 | Order            | 30 | 1.63    | 0.205          | <b>0.0001</b> |
|             |              |                 | Native/alien     | 1  | 0.95    | 0.004          | 0.4333        |
|             |              |                 | Woody/herbaceous | 1  | 5.62    | 0.024          | <b>0.0001</b> |
|             |              |                 | Mycorrhizal type | 3  | 1.34    | 0.017          | 0.1338        |
|             | Root         | Genus           | Month            | 1  | 1.39    | 0.005          | 0.1683        |
|             |              |                 | Order            | 32 | 1.30    | 0.158          | <b>0.0075</b> |
|             |              |                 | Native/alien     | 1  | 3.25    | 0.012          | <b>0.0015</b> |
|             |              |                 | Woody/herbaceous | 1  | 1.37    | 0.005          | 0.1826        |
|             |              |                 | Mycorrhizal type | 3  | 1.23    | 0.014          | 0.2030        |

650

651 A PERMANOVA was conducted for each target community (prokaryotes or fungi). The  
 652 explanatory variables included in the models were sampling month and four host plant  
 653 properties [order-level taxonomy, nativeness, lifeform (woody or herbaceous), and  
 654 mycorrhizal type]. *P* values significant after a Bonferroni correction are shown in bold for  
 655 each model ( $\alpha = 0.05$ ). See Supplementary Table 1 for results on community compositions at  
 656 the order level.

657

658 **TABLE 2** | Prokaryote and fungal genera showing preferences for months.

659

| Target      | Plant tissue | Preferred month | Phylum         | Genus                    | Preference score | FDR     |
|-------------|--------------|-----------------|----------------|--------------------------|------------------|---------|
| Prokaryotes | Leaf         | July            | Proteobacteria | <i>Bradyrhizobium</i>    | 3.48             | 0.00948 |
|             |              | September       | Actinobacteria | <i>Amnibacterium</i>     | 3.60             | 0.00159 |
|             |              | September       | Bacteroidetes  | <i>Spirosoma</i>         | 3.48             | 0.00211 |
|             |              | September       | Bacteroidetes  | <i>Hymenobacter</i>      | 3.08             | 0.00948 |
| Fungi       | Leaf         | July            | Basidiomycota  | <i>Leucosporidium</i>    | 4.32             | 0.00026 |
|             |              | July            | Ascomycota     | <i>Taphrina</i>          | 3.93             | 0.00064 |
|             |              | July            | Basidiomycota  | <i>Dioszegia</i>         | 3.11             | 0.01246 |
|             |              | August          | Ascomycota     | <i>Bryochiton</i>        | 3.28             | 0.00058 |
|             | Root         | September       | Ascomycota     | <i>Nigrospora</i>        | 3.58             | 0.00052 |
|             |              | September       | Ascomycota     | <i>Paraphaeosphaeria</i> | 3.57             | 0.00007 |
|             |              | July            | Basidiomycota  | <i>Agrocybe</i>          | 3.50             | 0.00384 |
|             |              | September       | Ascomycota     | <i>Paraphaeosphaeria</i> | 3.01             | 0.00686 |

660

661 Prokaryote and fungal genera are listed with their preference scores for specific months. The  
 662 *P* values obtained in the randomization analysis were converted to false discovery rates  
 663 (FDRs). Genera whose preference scores exceeded three are shown.

664

665 **TABLE 3** | Prokaryote and fungal genera showing preferences for native/alien plant species.

666

| Target      | Plant tissue  | Preferred host | Phylum              | Genus                     | Preference score | FDR                 |
|-------------|---------------|----------------|---------------------|---------------------------|------------------|---------------------|
| Prokaryotes | Leaf          | Alien          | Deinococcus.Thermus | <i>Deinococcus</i>        | 3.02             | 0.03634             |
|             |               | Alien          | Firmicutes          | <i>Staphylococcus</i>     | 3.24             | 0.01210             |
|             |               | Alien          | Actinobacteria      | <i>Dermacoccus</i>        | 3.60             | 0.02424             |
|             |               | Alien          | Actinobacteria      | <i>Rubrobacter</i>        | 3.70             | 0.00000             |
|             |               | Alien          | Nitrospirae         | <i>Nitrospira</i>         | 3.70             | 0.00000             |
|             |               | Alien          | Bacteroidetes       | <i>Fibrella</i>           | 3.74             | 0.00000             |
|             |               | Alien          | Bacteroidetes       | <i>Mucilaginitobacter</i> | 4.16             | 0.00551             |
|             |               | Alien          | Proteobacteria      | <i>Rhizomicrobium</i>     | 4.17             | 0.00075             |
|             |               | Alien          | Proteobacteria      | <i>Brevundimonas</i>      | 4.33             | 0.00558             |
|             |               | Alien          | Proteobacteria      | <i>Paraburkholderia</i>   | 4.88             | 0.00000             |
|             | Root          | Native         | Actinobacteria      | <i>Actinoallomurus</i>    | 3.63             | 0.00000             |
|             |               | Native         | Planctomycetes      | <i>Singulisphaera</i>     | 3.50             | 0.00013             |
|             |               | Alien          | Proteobacteria      | <i>Rhodomicrobium</i>     | 3.00             | 0.00000             |
|             |               | Alien          | Chloroflexi         | <i>Bellilinea</i>         | 3.01             | 0.00000             |
|             |               | Alien          | Tenericutes         | <i>Mycoplasma</i>         | 3.01             | 0.00000             |
|             |               | Alien          | Actinobacteria      | <i>Virgisporangium</i>    | 3.23             | 0.01696             |
|             |               | Fungi          | Leaf                | Alien                     | Basidiomycota    | <i>Filobasidium</i> |
| Alien       | Basidiomycota |                |                     | <i>Cryptococcus</i>       | 3.04             | 0.07470             |
| Alien       | Basidiomycota |                |                     | <i>Simocybe</i>           | 3.04             | 0.01482             |
| Alien       | Ascomycota    |                |                     | <i>Phoma</i>              | 3.16             | 0.04405             |
| Alien       | Ascomycota    |                |                     | <i>Preussia</i>           | 3.24             | 0.01482             |
| Alien       | Ascomycota    |                |                     | <i>Neoceratosperma</i>    | 3.24             | 0.01489             |
| Alien       | Ascomycota    |                |                     | <i>Hymenoscyphus</i>      | 3.31             | 0.07334             |
| Alien       | Basidiomycota |                |                     | <i>Sakaguchia</i>         | 3.50             | 0.00000             |
| Alien       | Basidiomycota |                |                     | <i>Sampaiozyma</i>        | 3.50             | 0.00000             |
| Alien       | Ascomycota    |                |                     | <i>Didymella</i>          | 3.52             | 0.00000             |
| Alien       | Ascomycota    |                |                     | <i>Dichotomopilus</i>     | 3.52             | 0.00000             |
| Alien       | Ascomycota    |                |                     | <i>Leohumicola</i>        | 3.56             | 0.00000             |
| Alien       | Ascomycota    |                |                     | <i>Pleurotheciella</i>    | 3.56             | 0.00000             |

|      |       |                 |                          |      |         |
|------|-------|-----------------|--------------------------|------|---------|
|      | Alien | Basidiomycota   | <i>Rhodospordiobolus</i> | 3.73 | 0.00349 |
|      | Alien | Basidiomycota   | <i>Peniophora</i>        | 3.94 | 0.00431 |
| Root | Alien | Ascomycota      | <i>Candida</i>           | 3.00 | 0.00000 |
|      | Alien | Ascomycota      | <i>Curvularia</i>        | 3.00 | 0.00000 |
|      | Alien | Ascomycota      | <i>Mycoleptodiscus</i>   | 3.00 | 0.00000 |
|      | Alien | Ascomycota      | <i>Cylindrocarpon</i>    | 3.01 | 0.00000 |
|      | Alien | Ascomycota      | <i>Microdochium</i>      | 3.01 | 0.00000 |
|      | Alien | Chytridiomycota | <i>Nowakowskiella</i>    | 3.02 | 0.00000 |
|      | Alien | Ascomycota      | <i>Drechslera</i>        | 3.57 | 0.01482 |
|      | Alien | Ascomycota      | <i>Meliniomyces</i>      | 4.00 | 0.00255 |

---

667

668 Prokaryote and fungal genera are listed with their preference scores for native/alien plant  
669 species. The *P* values obtained in the randomization analysis was converted to false discovery  
670 rates (FDRs). Genera whose preference scores exceeded three are shown.

671

672

673 **TABLE 4** | Prokaryote and fungal genera showing preferences for mycorrhizal types of host  
 674 plant species.

675

| Target      | Plant tissue  | Preferred host | Phylum         | Genus                     | Preference score | FDR                |
|-------------|---------------|----------------|----------------|---------------------------|------------------|--------------------|
| Prokaryotes | Leaf          | NM             | Actinobacteria | <i>Cellulomonas</i>       | 4.63             | 0.00000            |
|             |               | NM             | Actinobacteria | <i>Pseudonocardia</i>     | 4.53             | 0.00343            |
|             |               | EcM            | Chlamydiae     | <i>Parachlamydia</i>      | 5.40             | 0.00000            |
|             |               | EcM            | Bacteroidetes  | <i>Fibrella</i>           | 5.39             | 0.00000            |
|             |               | EcM            | Crenarchaeota  | <i>Fervidicoccus</i>      | 5.21             | 0.00576            |
|             |               | EcM            | Proteobacteria | <i>Steroidobacter</i>     | 5.04             | 0.04904            |
|             |               | EcM            | Firmicutes     | <i>Staphylococcus</i>     | 4.74             | 0.00628            |
|             | Root          | NM-AM          | Proteobacteria | <i>Janthinobacterium</i>  | 4.70             | 0.00000            |
|             |               | NM             | Actinobacteria | <i>Ferrimicrobium</i>     | 5.60             | 0.00364            |
|             |               | NM             | Proteobacteria | <i>Arenimonas</i>         | 5.51             | 0.00048            |
|             |               | NM             | Proteobacteria | <i>Sandarakinorhabdus</i> | 4.81             | 0.00000            |
|             |               | NM             | Actinobacteria | <i>Kineococcus</i>        | 4.77             | 0.00000            |
|             |               | NM             | Actinobacteria | <i>Microthrix</i>         | 4.66             | 0.00000            |
|             |               | EcM            | Chlamydiae     | <i>Neochlamydia</i>       | 5.68             | 0.00000            |
|             |               | EcM            | Bacteroidetes  | <i>Flavisolibacter</i>    | 4.94             | 0.00562            |
|             |               | EcM            | Proteobacteria | <i>Phenylobacterium</i>   | 4.75             | 0.04771            |
|             |               | Fungi          | Leaf           | NM-AM                     | Ascomycota       | <i>Microscypha</i> |
| NM-AM       | Ascomycota    |                |                | <i>Spegazzinia</i>        | 4.95             | 0.00000            |
| NM-AM       | Ascomycota    |                |                | <i>Zygothiala</i>         | 4.61             | 0.03060            |
| NM          | Ascomycota    |                |                | <i>Debaryomyces</i>       | 5.71             | 0.00000            |
| NM          | Ascomycota    |                |                | <i>Exophiala</i>          | 5.65             | 0.00053            |
| NM          | Ascomycota    |                |                | <i>Striaticonidium</i>    | 4.53             | 0.00000            |
| EcM         | Ascomycota    |                |                | <i>Apodus</i>             | 4.67             | 0.00000            |
| EcM         | Ascomycota    |                |                | <i>Nemania</i>            | 4.66             | 0.00000            |
| EcM         | Basidiomycota |                |                | <i>Pholiota</i>           | 4.66             | 0.00000            |
| EcM         | Basidiomycota |                |                | <i>Hyphodontia</i>        | 4.66             | 0.00000            |
| EcM         | Ascomycota    |                |                | <i>Drechslera</i>         | 4.64             | 0.00000            |
| EcM         | Ascomycota    |                |                | <i>Pleurotheciella</i>    | 4.62             | 0.00000            |
| EcM         | Ascomycota    |                |                | <i>Nigrospora</i>         | 4.57             | 0.02153            |

|      |       |                  |                        |      |         |
|------|-------|------------------|------------------------|------|---------|
| Root | NM-AM | Ascomycota       | <i>Stagonospora</i>    | 6.06 | 0.00000 |
|      | NM-AM | Ascomycota       | <i>Dendryphion</i>     | 5.54 | 0.00000 |
|      | NM-AM | Ascomycota       | <i>Minutisphaera</i>   | 5.52 | 0.00930 |
|      | NM-AM | Basidiomycota    | <i>Asterostroma</i>    | 5.11 | 0.02706 |
|      | NM-AM | Basidiomycota    | <i>Amphinema</i>       | 5.11 | 0.00570 |
|      | NM-AM | Ascomycota       | <i>Nigrospora</i>      | 4.91 | 0.04418 |
|      | NM-AM | Ascomycota       | <i>Metapochonia</i>    | 4.75 | 0.01422 |
|      | NM    | Ascomycota       | <i>Mycoarthritis</i>   | 5.97 | 0.00018 |
|      | NM    | Entorrhizomycota | <i>Entorrhiza</i>      | 4.97 | 0.00000 |
|      | NM    | Ascomycota       | <i>Myrothecium</i>     | 4.95 | 0.00000 |
|      | NM    | Ascomycota       | <i>Infundichalara</i>  | 4.92 | 0.00000 |
|      | NM    | Ascomycota       | <i>Pleurotheciella</i> | 4.92 | 0.00000 |
|      | NM    | Basidiomycota    | <i>Curvibasidium</i>   | 4.92 | 0.00000 |
|      | NM    | Ascomycota       | <i>Colletotrichum</i>  | 4.87 | 0.03815 |
|      | NM    | Ascomycota       | <i>Sugiyamaella</i>    | 4.81 | 0.00000 |
|      | EcM   | Ascomycota       | <i>Leptodontidium</i>  | 9.48 | 0.00000 |
|      | EcM   | Basidiomycota    | <i>Laccaria</i>        | 5.47 | 0.00000 |
|      | EcM   | Ascomycota       | <i>Phialocephala</i>   | 5.46 | 0.00398 |
|      | EcM   | Ascomycota       | <i>Curvularia</i>      | 5.46 | 0.00000 |
|      | EcM   | Ascomycota       | <i>Mycoleptodiscus</i> | 5.46 | 0.00000 |
|      | EcM   | Ascomycota       | <i>Paecilomyces</i>    | 5.37 | 0.01422 |
|      | EcM   | Ascomycota       | <i>Robillarda</i>      | 5.15 | 0.00476 |
|      | EcM   | Basidiomycota    | <i>Tomentella</i>      | 5.04 | 0.01568 |

676

677 Prokaryote and fungal genera are listed with their preference scores for mycorrhizal types of  
678 plant species. The *P* values obtained in the randomization analysis was converted to false  
679 discovery rates (FDRs). The genera whose preference scores exceeded 4.5 are shown. See  
680 Supplementary Table 3 for the list of genera whose preference scores were higher than three.  
681 EcM, ectomycorrhizal; AM, arbuscular mycorrhizal; NM, non-mycorrhizal; NM-AM,  
682 variable mycorrhizal (i.e., non-mycorrhizal or arbuscular mycorrhizal).

683

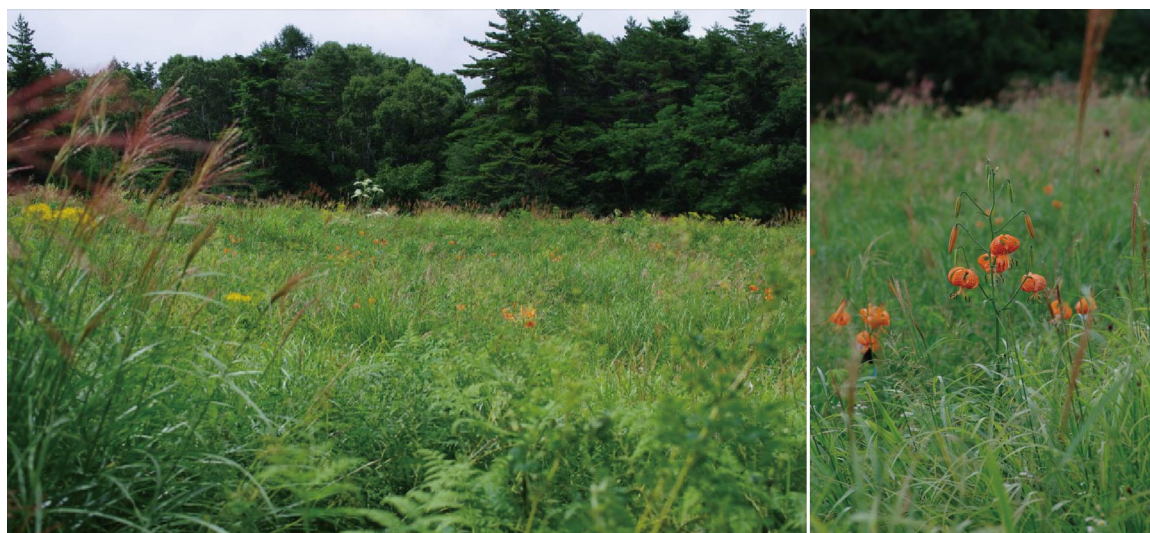

684

685

686 **FIGURE 1** | Grassland of Sugadaira Research Station.

687



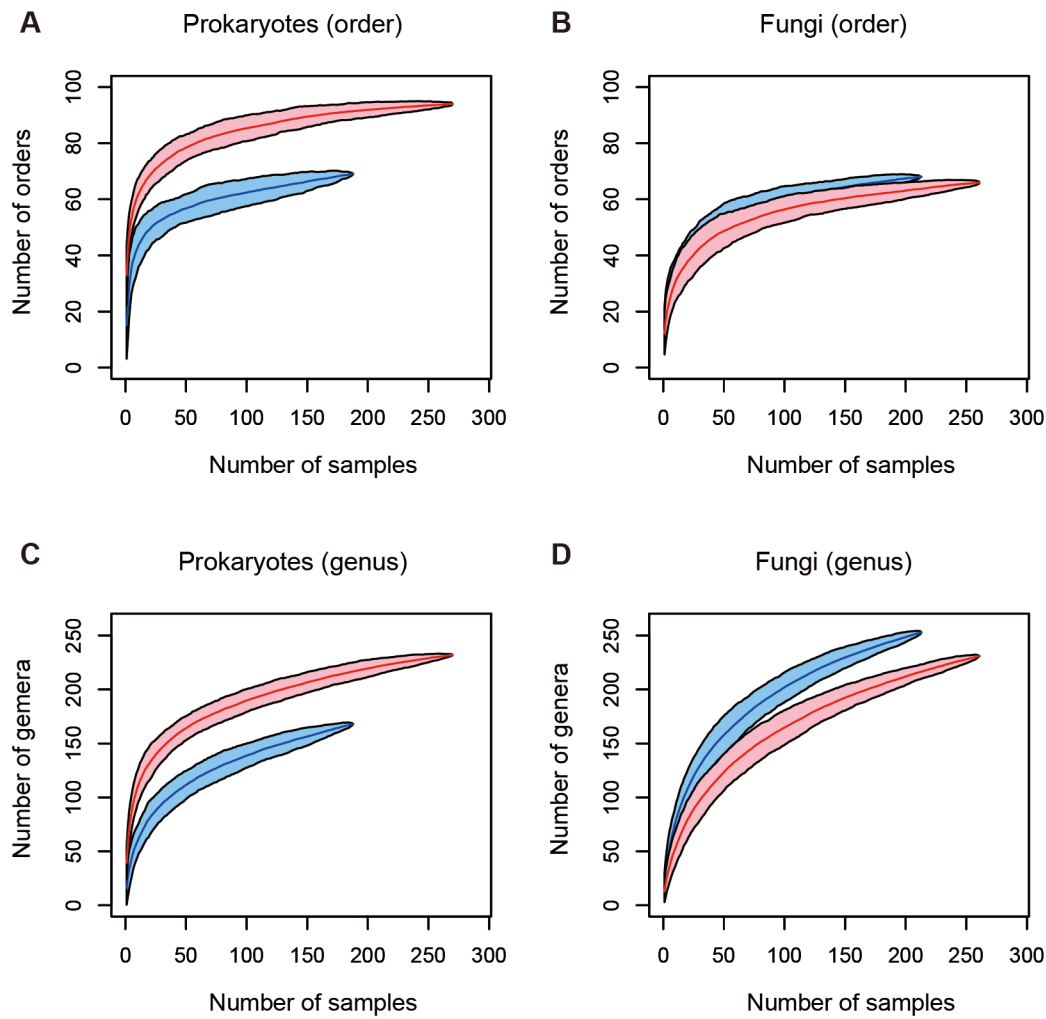

688

689

690 **FIGURE 2** | Relationship between the number of leaf/root samples and that of  
691 prokaryote/fungal taxa observed. **(A)** Number of prokaryote orders. In total, sequencing data  
692 were successfully obtained from 188 leaf and 270 root samples. Blue and red curves represent  
693 leaf and root samples, respectively. **(B)** Number of fungal orders. In total, sequencing data  
694 were successfully obtained from 213 leaf and 261 root samples. **(C)** Number of prokaryote  
695 genera (188 leaf and 270 root samples). **(D)** Number of fungal genera (213 leaf and 261 root  
696 samples).

697

### A Prokaryotes (leaf)

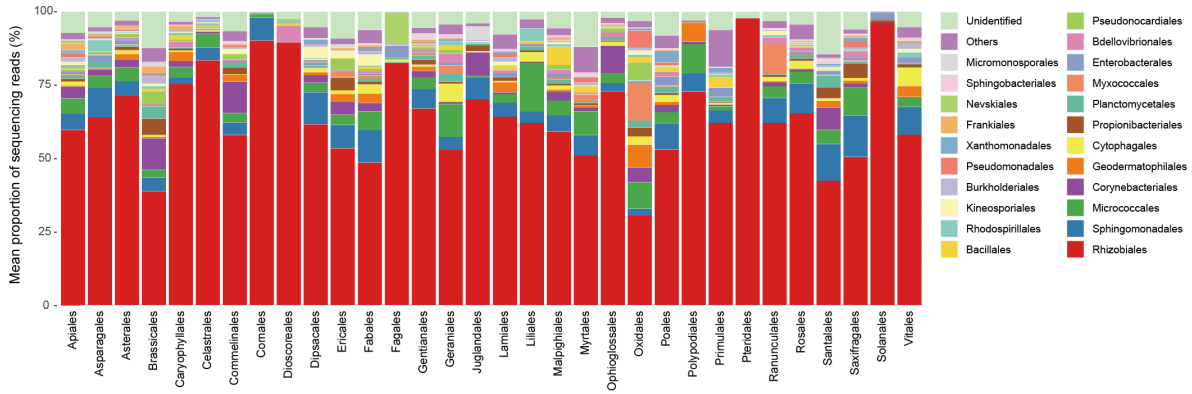

### B Prokaryotes (root)

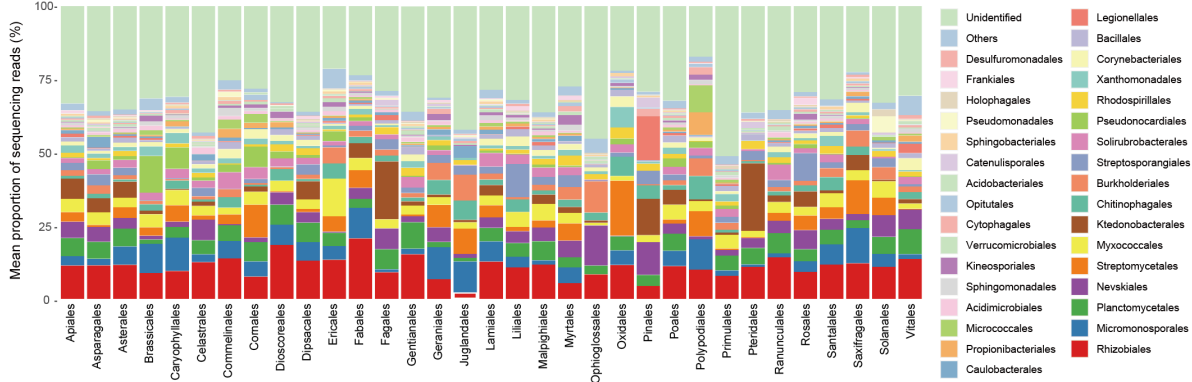

### C Fungi (leaf)

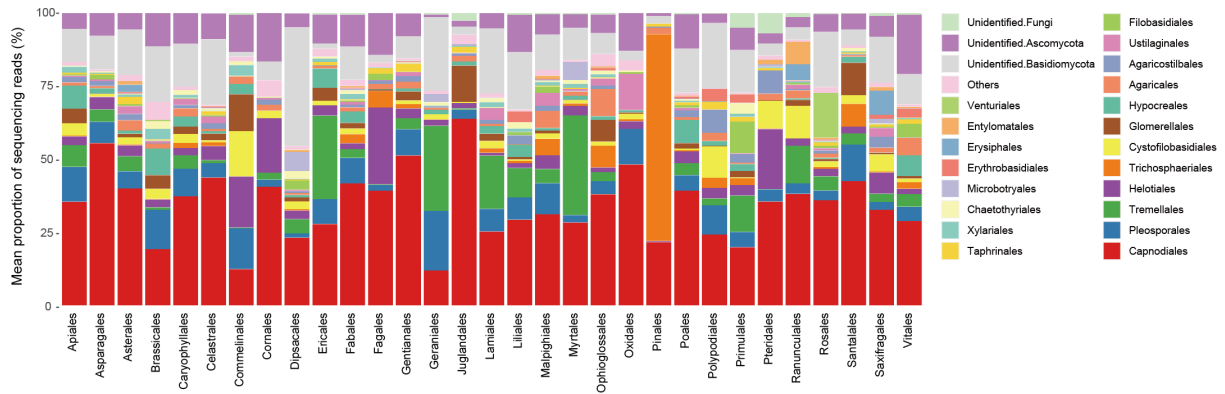

### D Fungi (root)

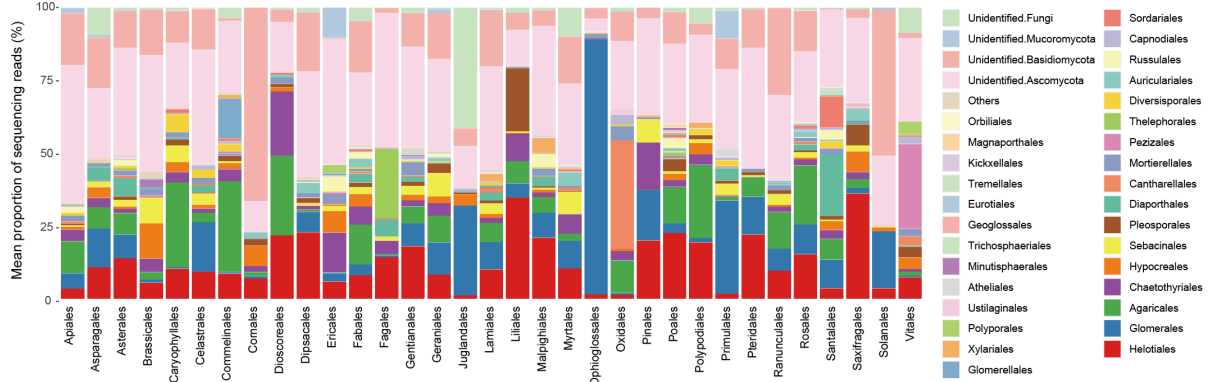

698

699

700 **FIGURE 3** | Prokaryote and fungal community compositions. **(A)** Order-level compositions  
701 of prokaryotes in leaf samples. Mean proportions of sequencing reads are shown for each  
702 plant order. In total, sequencing data were successfully obtained from 188 leaf samples. **(B)**  
703 Order-level compositions of prokaryotes in root samples (270 root samples). **(C)** Order-level  
704 compositions of fungi in leaf samples (213 leaf samples). Mean proportions of sequencing  
705 reads are shown for each plant order. **(D)** Order-level compositions of fungi in root samples  
706 (261 root samples).
